# Supplementary material
Source: PubMed Central journal article supplement (PMC8935211)
Supplement: develop-149-200025-s1.pdf [file develop-149-200025-s1.pdf]

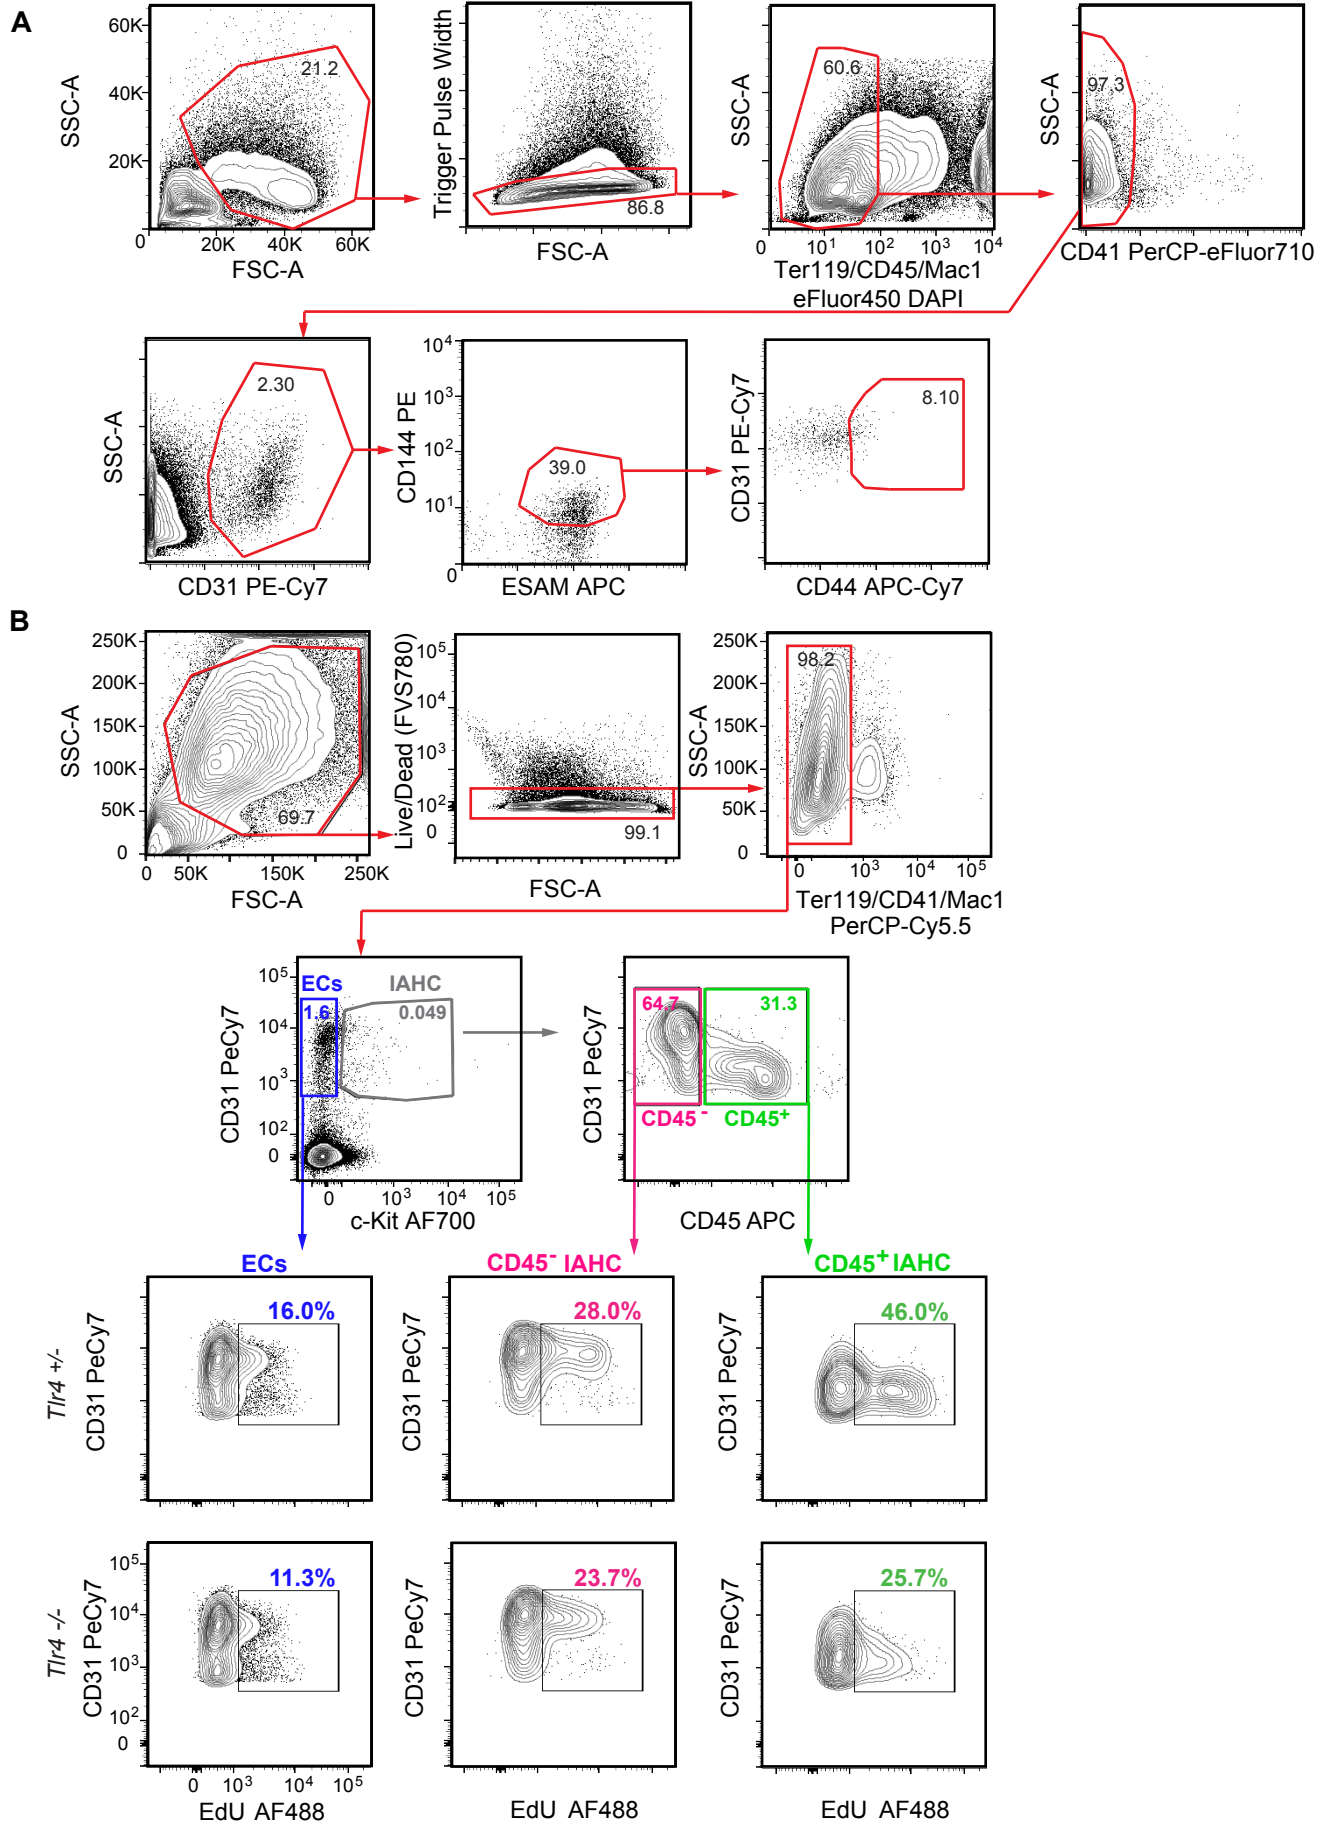

**Fig. S1. HE cell numbers are normal at E9.5, whereas the proliferation of CD45<sup>+</sup> IAHC cells at E10.5 is decreased.**

- A) Representative flow plots depicting the sorting strategy for arterial endothelial cells (ECs) for limiting dilution assays (CD31<sup>+</sup>CD144<sup>+</sup>ESAM<sup>+</sup>CD44<sup>+</sup>CD41<sup>lo/-</sup>Ter119<sup>-</sup>Mac1<sup>-</sup>CD45<sup>-</sup>). Numbers on the x and y-axes are indicated on the first plot and are not shown on subsequent plots if the scale is unchanged. Related to Fig. 1F.
- B) Representative flow plots depicting gating strategy of ECs, CD45<sup>-</sup> and CD45<sup>+</sup> IAHC cells and the percent of EdU<sup>+</sup> cells in each population in *Tlr4*<sup>+/-</sup> and *Tlr4*<sup>-/-</sup> embryos. Related to Fig. 1M,N.

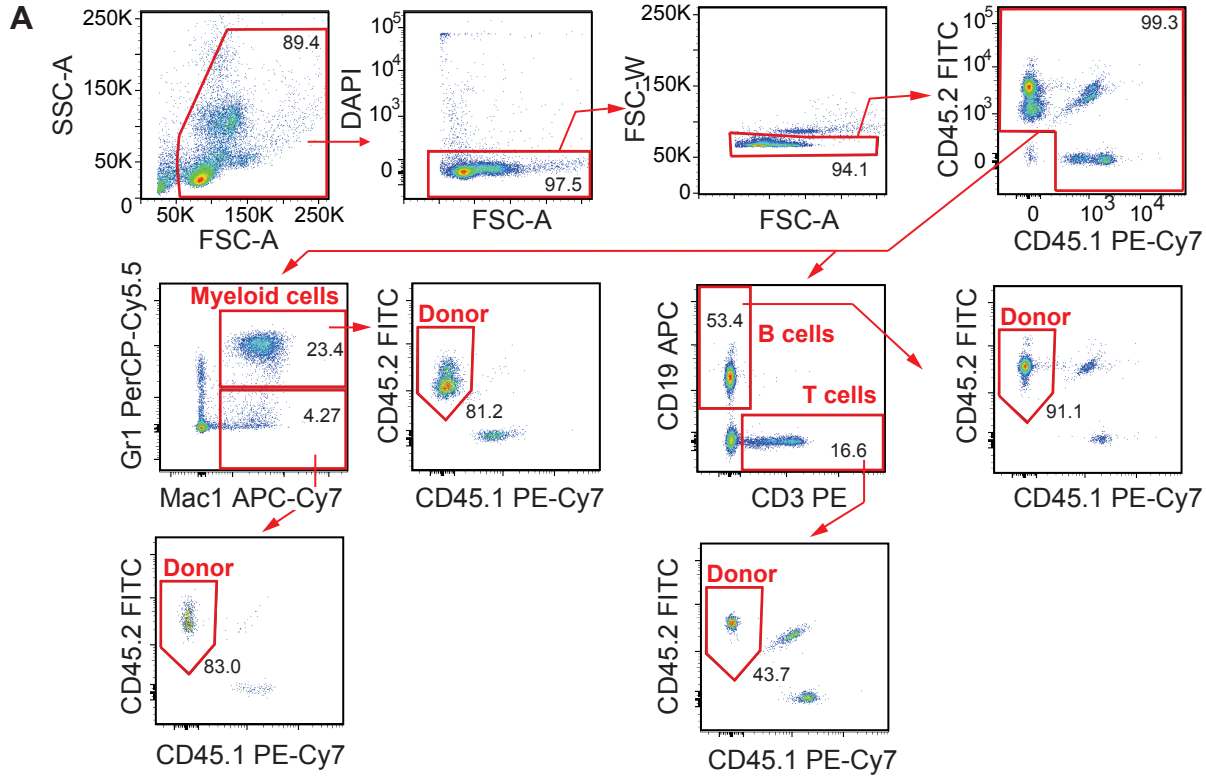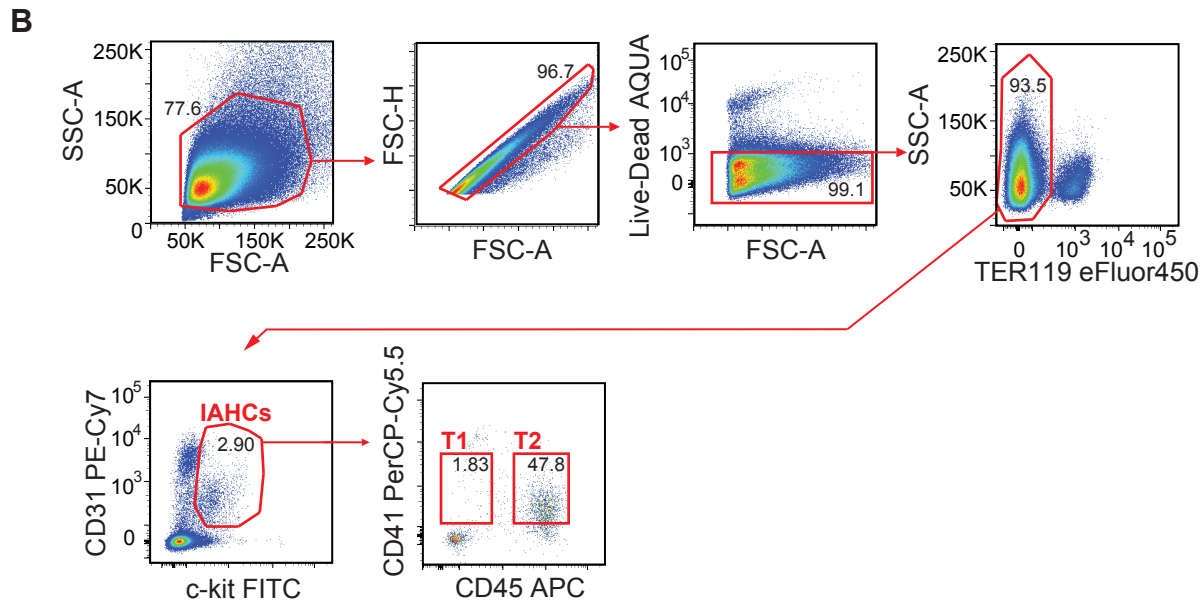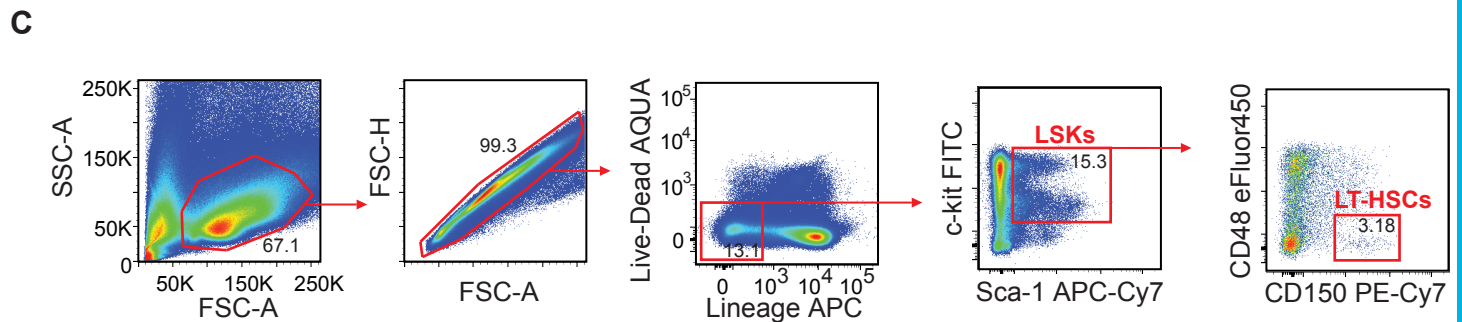

**Fig. S2. Loss of MyD88 increases the number of adult-repopulating HSCs.**

- A) Representative flow plots depicting gating strategy of myeloid, B and T cells in transplant recipient mice and the percentage of donor cells in each lineage. Related to data in Fig. 2C,D.
- B) Representative flow plots depicting gating strategy for phenotypic type I (T1) or type II (T2) pre-HSCs in the AGM regions of E11.0 *Tlr4<sup>+/+</sup>* and *Tlr4<sup>-/-</sup>* embryos. Related to data in Fig. 2E.
- C) Representative flow plots depicting gating strategy for phenotypic long-term repopulating HSCs (LT-HSCs) in E12.5 and E13.5 fetal livers of *Tlr4<sup>+/+</sup>* and *Tlr4<sup>-/-</sup>* embryos. Related to data in Fig. 2F.

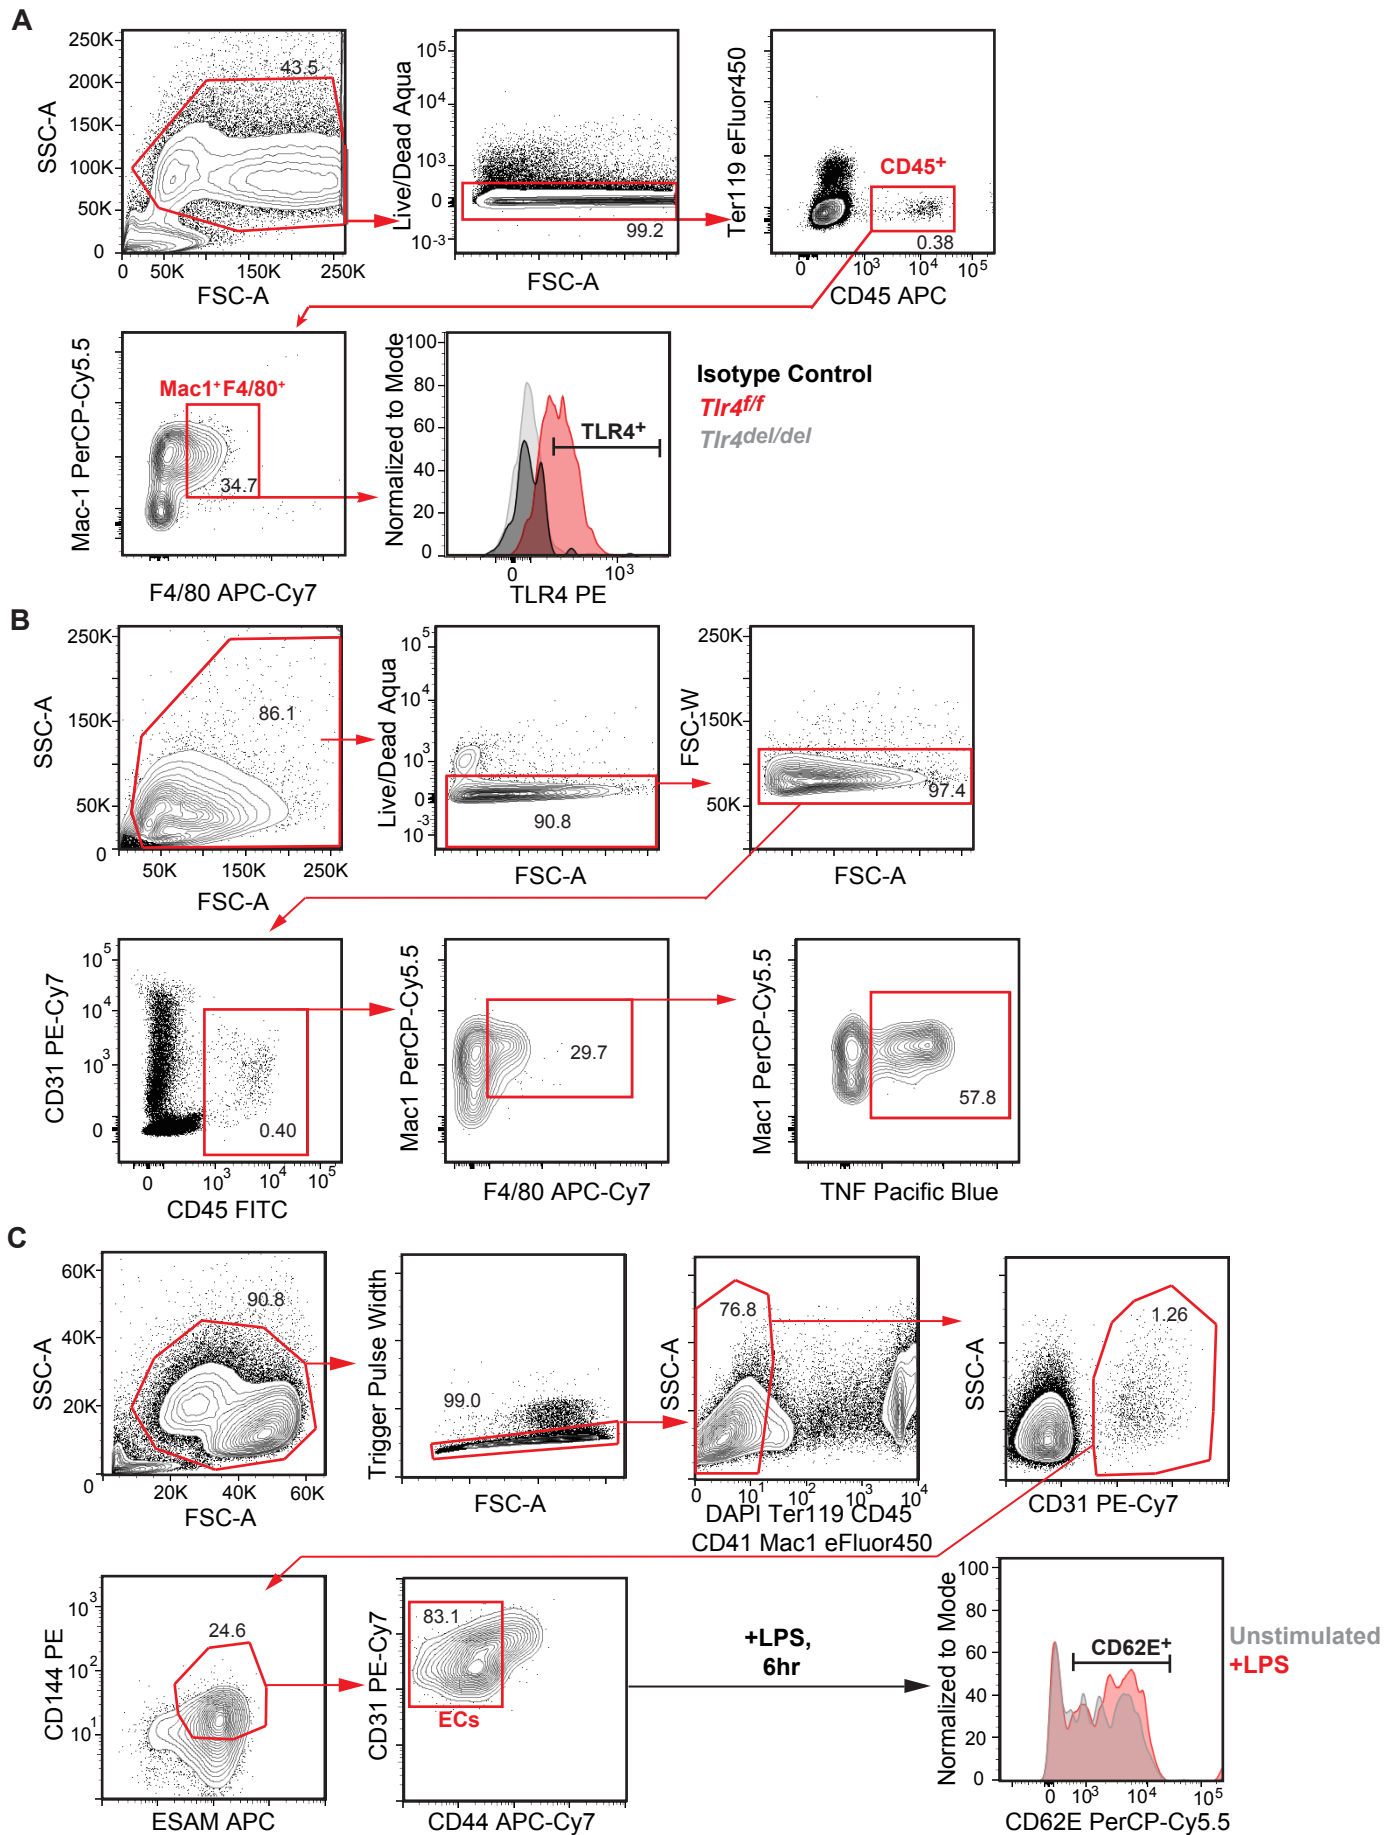

**Fig. S3. Csf1r-Cre reduces cell surface TLR4 and TLR4 signaling in embryonic macrophages.**

- A) Representative flow plots depicting gating strategy to examine surface TLR4 on embryonic macrophages. Related to data in Fig. 3A,B.
- B) Representative flow plots depicting gating strategy to examine the percentage of TNF<sup>+</sup> macrophages following LPS stimulation of isolated AGM regions *ex vivo*. Related to data in Fig. 3C-D,G-H.
- C) Representative flow plots depict sorting strategy for ECs (CD31<sup>+</sup>ESAM<sup>+</sup>CD144<sup>+</sup>CD44<sup>-</sup>CD41<sup>lo/-</sup>Ter119<sup>-</sup>Mac1<sup>-</sup>CD45<sup>-</sup>). Related to data in Fig. 3K. Sorted ECs were stimulated with 100ng/mL LPS for 6 hours and CD62E surface expression analyzed by flow cytometry. A representative histogram is shown depicting gating of CD62E<sup>+</sup> cells where the gray histogram is from unstimulated and the red histogram from stimulated EC cells (+LPS).

**Table S1.** List of all antibodies used for flow cytometry and whole mount immunostaining. For each antibody, the clone, fluorophore, dilution, manufacturer, and antibody registry number (or manufacturer's catalog number when no RRID number is available) are provided.

| Antibody       | Clone                   | Fluorophore     | Supplier       | RRID #      | Dilution |
|----------------|-------------------------|-----------------|----------------|-------------|----------|
| c-Kit          | 2B8                     | Alexa Fluor 700 | Thermo Fisher  | AB_657583   | 1:200    |
| c-Kit          | 2B8                     | APC- eFluor 780 | Thermo Fisher  | AB_1272213  | 1:200    |
| c-Kit          | 2B8                     | Unconjugated    | Thermo Fisher  | AB_467434   | 1:250    |
| CD3e           | 145-2C11                | APC             | Biolegend      | AB_312677   | 1:200    |
| CD3e           | 145-2C11                | PE              | Thermo Fisher  | AB_465496   | 1:200    |
| CD19           | eBio1D3 (1D3)           | APC             | Thermo Fisher  | AB_1659676  | 1:200    |
| CD31 (PECAM-1) | 390                     | PE-Cy7          | Thermo Fisher  | AB_2716949  | 1:200    |
| CD31           | MEC13.3                 | Unconjugated    | BD Biosciences | AB_396660   | 1:500    |
| CD41a          | eBioMWRReg30 (MWRReg30) | eFluor450       | Thermo Fisher  | AB_1582238  | 1:200    |
| CD44           | IM7                     | APC-Cy7         | BD Biosciences | AB_1727481  | 1:200    |
| CD45           | RA3-6B2                 | eFluor450       | Thermo Fisher  | AB_1548761  | 1:200    |
| CD45           | 30-F11                  | PE              | Biolegend      | AB_312971   | 1:200    |
| CD45.1         | A20                     | APC-Cy7         | Biolegend      | AB_313505   | 1:200    |
| CD45.1         | A20                     | PE-Cy7          | Thermo Fisher  | AB_469629   | 1:200    |
| CD45.2         | 104                     | FITC            | Thermo Fisher  | AB_465062   | 1:200    |
| CD45R/B220     | RA3-6B2                 | APC             | Biolegend      | AB_312997   | 1:200    |
| CD48           | HM48-1                  | eFluor450       | Thermo Fisher  | AB_11151336 | 1:200    |
| CD61           | 2C9.G2 (HM $\beta$ 3-1) | FITC            | BD Biosciences | AB_10895806 | 1:200    |
| CD62E          | 10E9.6                  | Biotin          | BD Biosciences | AB_395030   | 1:200    |
| CD135 (Flt-3)  | A2F10                   | PE              | Biolegend      | AB_1877218  | 1:200    |
| CD144          | eBioBV13 (BV13)         | APC             | Thermo Fisher  | AB_10597442 | 1:200    |
| CD144          | eBioBV13 (BV13)         | PE              | Thermo Fisher  | AB_1907346  | 1:200    |
| CD150          | TC15-12F12.2            | PE-Cy7          | Biolegend      | AB_439797   | 1:200    |
| CD284 (TLR4)   | SA15-21                 | PE              | Biolegend      | AB_2561873  | 1:200    |
| ESAM           | 1G8/ESAM                | APC             | Biolegend      | AB_2101658  | 1:200    |
| ESAM           | 1G8/ESAM                | PE              | Biolegend      | AB_1953300  | 1:200    |
| F4/80          | BM8                     | APC-Cy7         | Biolegend      | AB_893477   | 1:200    |
| Gr-1           | RB6-8C5                 | APC             | Biolegend      | AB_313377   | 1:200    |
| Gr-1           | RB6-8C5                 | PerCP-Cy5.5     | Thermo Fisher  | AB_906247   | 1:200    |
| Ki67           |                         | Unconjugated    | Abcam          | AB_443209   | 1:500    |
| Mac-1          | M1/70                   | APC             | Biolegend      | AB_312795   | 1:200    |
| Mac-1          | M1/70                   | APC-Cy7         | BD Biosciences | AB_396772   | 1:200    |
| Mac-1          | M1/70                   | eFluor450       | Thermo Fisher  | AB_1582236  | 1:200    |
| Nk1.1          | PK136                   | APC             | Biolegend      | AB_313397   | 1:200    |

|                                                 |          |                 |               |                      |        |
|-------------------------------------------------|----------|-----------------|---------------|----------------------|--------|
| Rat IgG2a, $\kappa$<br>Isotype Ctrl<br>Antibody | RTK2758  | PE              | Biolegend     | AB_326530            | 1:200  |
| RUNX1                                           | EPR3099  | Unconjugated    | Abcam         | AB_2049267           | 1:500  |
| Sca-1                                           | D7       | PerCP-Cy5.5     | Thermo Fisher | AB_914372            | 1:200  |
| Streptavidin                                    |          | PerCP-Cy5.5     | Biolegend     | AB_2716577           | 1:200  |
| Ter119                                          | TER-119  | APC             | Biolegend     | AB_313713            | 1:200  |
| Ter119                                          | TER-119  | eFluor450       | Thermo Fisher | AB_1518808           | 1:200  |
| Ter119                                          | TER-119  | PerCP-Cy5.5     | Thermo Fisher | AB_925766            | 1:200  |
| TNF-alpha                                       | MP6-XT22 | Pacific Blue    | Biolegend     | AB_893639            | 1:200  |
| Goat Anti-<br>Rabbit IgG                        |          | Alexa Fluor 488 | Abcam         | AB_2630356           | 1:1000 |
| Goat Anti-<br>Rabbit IgG                        |          | Alexa Fluor 647 | Thermo Fisher | AB_2535813           | 1:1000 |
| Goat Anti-Rat<br>IgG                            |          | Alexa Fluor 555 | Abcam         | Cat. No:<br>ab150158 | 1:1000 |
| Goat Anti-Rat<br>IgG                            |          | Alexa Fluor 647 | Abcam         | AB_2864291           | 1:500  |
